# Supplementary material
Source: PubMed Central journal article supplement (PMC2566968)
Supplement: NIHMS63288-supplement-1si20060324_04.pdf [file NIHMS63288-supplement-1si20060324_04.pdf]

$^1\text{H}$  NMR study of the magnetic properties and  
electronic structure of the hydroxide complex of  
substrate-bound heme oxygenase from *Nesseria*  
*meningitidis*; Influence of the axial water deprotonation  
on the distal H-bond network

Li-Hua Ma<sup>†</sup>, Yangzhong Liu<sup>†</sup>, Xuhang Zhang<sup>‡</sup>, Tadashi Yoshida<sup>‡</sup> and Gerd N. La Mar<sup>†\*</sup>

Supporting Information

Four figures (partially relaxed spectra for *NmHO*-PH-OH, Curie plot for heme methyls and comparison of magnetic axes determination for *NmHO*-PH-CN with and without considerations of rhombic anisotropies, and labile proton saturation factors) and one Table (chemical shifts for assigned *NmHO*-PH-OH residues), total 5 pages.

**Table S1.** Observed chemical shifts for assigned residues in *NmHO-PH-OH*<sup>a</sup>

|        |                                | $\delta_{\text{DSS}}(\text{obs})$ |  |        |                                |       |
|--------|--------------------------------|-----------------------------------|--|--------|--------------------------------|-------|
| Ala12  | C $_{\alpha}$ H                | 3.39                              |  | His141 | C $_{\delta 2}$ H              | 6.30  |
|        | C $_{\beta}$ H <sub>3</sub>    | 1.24                              |  |        | C $_{\epsilon 1}$ H            | 7.60  |
| Leu15  | C $_{\delta 1}$ H <sub>3</sub> | -0.60                             |  | Leu142 | C $_{\delta 2}$ H <sub>3</sub> | 0.80  |
| Thr20  | C $_{\gamma}$ H <sub>3</sub>   | 1.30                              |  |        | C $_{\gamma}$ H                | 0.05  |
| Ala21  | C $_{\beta}$ H <sub>3</sub>    | 1.47                              |  | Asn147 | C $_{\alpha}$ H                | 4.15  |
| Val22  | C $_{\gamma 1}$ H <sub>3</sub> | 0.70                              |  |        | C $_{\beta 1}$ H               | 1.42  |
|        | C $_{\gamma 2}$ H <sub>3</sub> | 0.98                              |  |        | C $_{\beta 2}$ H               | 1.96  |
| Asp24  | C $_{\beta 1}$ H               | 2.82                              |  | Trp153 | C $_{\delta 1}$ H              | 6.95  |
|        | C $_{\beta 2}$ H               | 3.08                              |  | Val157 | C $_{\alpha}$ H                | 2.85  |
| Phe52  | C $_{\alpha}$ H                | 4.40                              |  |        | C $_{\beta}$ H                 | 1.55  |
|        | C $_{\beta 1}$ H               | 3.03                              |  |        | C $_{\gamma 1}$ H <sub>3</sub> | 0.37  |
|        | C $_{\beta 2}$ H               | 3.13                              |  |        | C $_{\gamma 2}$ H <sub>3</sub> | -0.02 |
|        | C $_{\epsilon}$ Hs             | 7.43                              |  | Ala180 | C $_{\alpha}$ H                | 2.58  |
|        | C $_{\zeta}$ H                 | 7.31                              |  |        | C $_{\beta}$ H <sub>3</sub>    | 0.58  |
| His53  | C $_{\delta 1}$ H              | 7.45                              |  | Phe181 | C $_{\beta 1}$ H               | 3.57  |
|        | C $_{\epsilon 2}$ H            | 7.95                              |  |        | C $_{\beta 2}$ H               | 3.03  |
| Tyr112 | C $_{\beta 1}$ H               | 3.02                              |  | Ala182 | C $_{\alpha}$ H                | 4.10  |
|        | C $_{\beta 2}$ H               | 3.30                              |  |        | C $_{\beta}$ H <sub>3</sub>    | 1.66  |
|        | C $_{\delta}$ Hs               | 6.90                              |  | Phe183 | C $_{\alpha}$ H                | 4.53  |
| Cys113 | C $_{\beta 1}$ H               | 2.72                              |  |        | C $_{\beta 1}$ H               | 3.68  |
|        | C $_{\beta 2}$ H               | 2.76                              |  |        | C $_{\beta 2}$ H               | 3.42  |
| Ala114 | C $_{\alpha}$ H                | 4.37                              |  |        | C $_{\delta}$ Hs               | 7.64  |
|        | C $_{\beta}$ H <sub>3</sub>    | 1.90                              |  |        | C $_{\epsilon}$ Hs             | 7.37  |
| Asn118 | C $_{\beta 1}$ H               | 3.12                              |  | Tyr184 | C $_{\delta}$ Hs               | 6.18  |
|        | C $_{\beta 2}$ H               | 3.02                              |  |        | C $_{\epsilon}$ Hs             | 6.48  |
| Ala121 | C $_{\beta}$ H <sub>3</sub>    | 2.30                              |  | Val186 | C $_{\alpha}$ H                | 3.64  |
| Phe125 | C $_{\delta}$ Hs               | 7.04                              |  |        | C $_{\beta}$ H                 | 2.40  |
|        | C $_{\epsilon}$ Hs             | 7.12                              |  |        | C $_{\gamma 2}$ H <sub>3</sub> | 1.25  |
|        | C $_{\zeta}$ H                 | 7.20                              |  | Val187 | C $_{\alpha}$ H                | 3.42  |
| Ala139 | C $_{\alpha}$ H                | 4.11                              |  |        | C $_{\beta}$ H                 | 1.50  |
|        |                                |                                   |  |        | C $_{\gamma 1}$ H <sub>3</sub> | 0.69  |
|        |                                |                                   |  |        | C $_{\gamma 2}$ H <sub>3</sub> | 0.08  |

a)  $\delta_{\text{DSS}}(\text{obs})$  in ppm referenced to DSS via the solvent resonance, in <sup>2</sup>H<sub>2</sub>O at pH 9.1, 100 mM bicarbonate at 25°C.

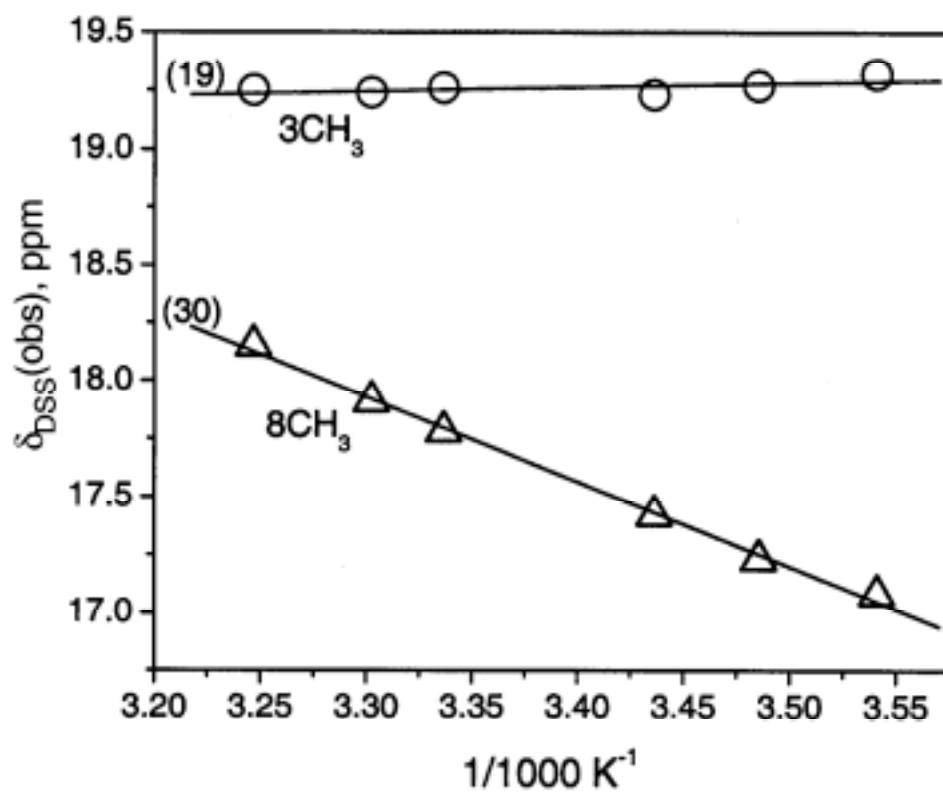

**Figure S1.** Curie plot ( $^1H$  NMR  $\delta_{DSS}(obs)$  versus reciprocal absolute temperature ( $T^{-1}$ )) for the resolved heme methyl peak for *NmHO-PH-OH* at pH 10.5, in  $^2H_2O$ , 100 mM bicarbonate at 25°C. The apparent intercepts, in ppm, at  $T^{-1} = 0$ , are given in parenthesis.

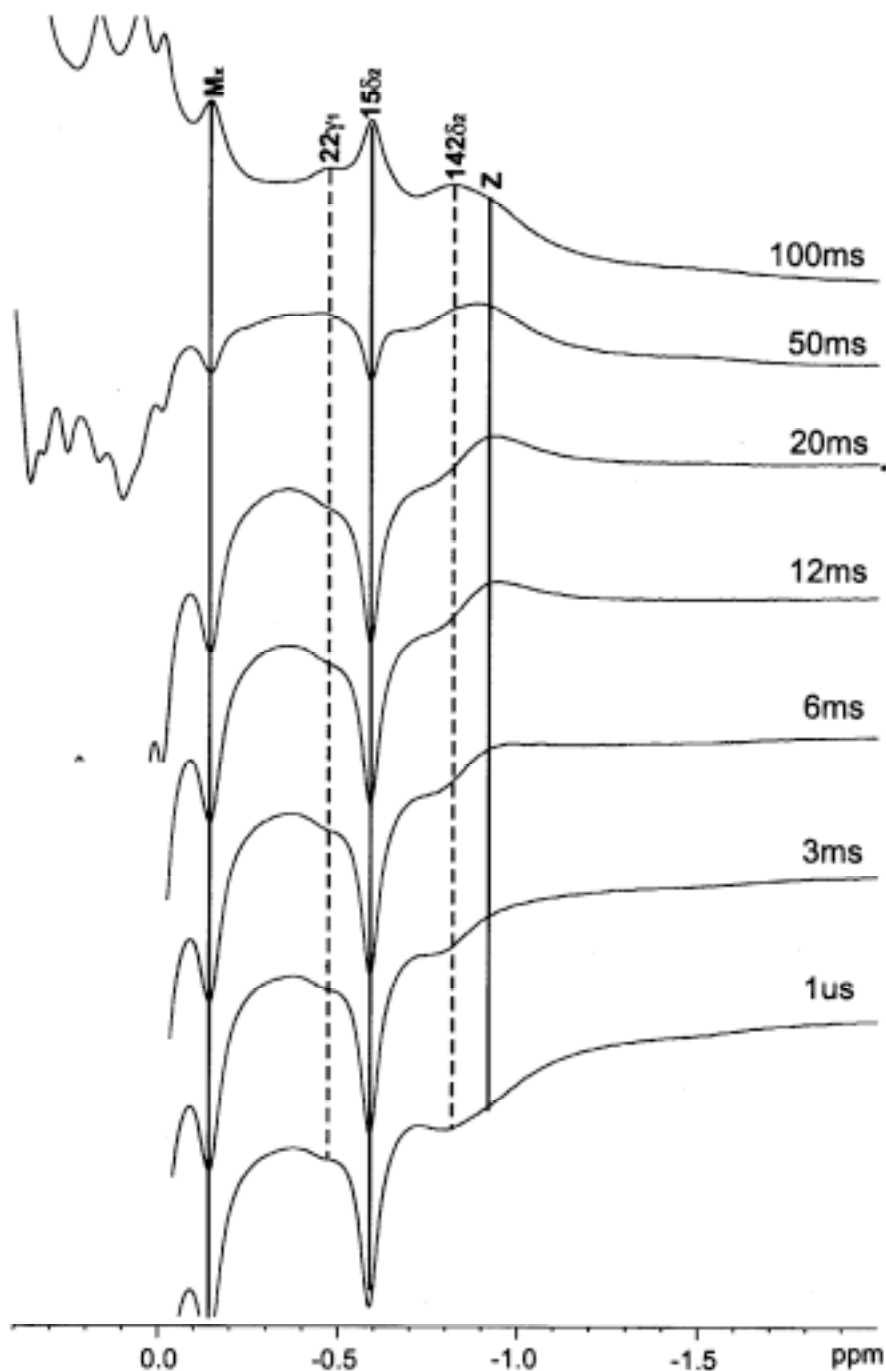

**Figure S2.** Partially relaxed spectra in an inversion-recovery pulse sequence for the resolved upfield 600 MHz  $^1\text{H}$  NMR spectrum of *NmHO*-PH- $^2\text{H}_2\text{O}$  in  $^2\text{H}_2\text{O}$  100 mM bicarbonate, pH 10.5 at 25°C. The relaxation delay times are given on the right. Peaks are labeled by amino acid number and proton position, with solid and dashed lines representing signals in *NmHO*-PH-OH and *NmHO*-PH- $\text{H}_2\text{O}$ , respectively. The single proton peak z exhibits a null at  $\sim 5$  ms, or a  $T_1 \sim 8$  ms, and exhibits the shift<sup>38, 49</sup> and  $T_1$  are consistent with it arising from a vinyl  $\text{H}_\beta$ .

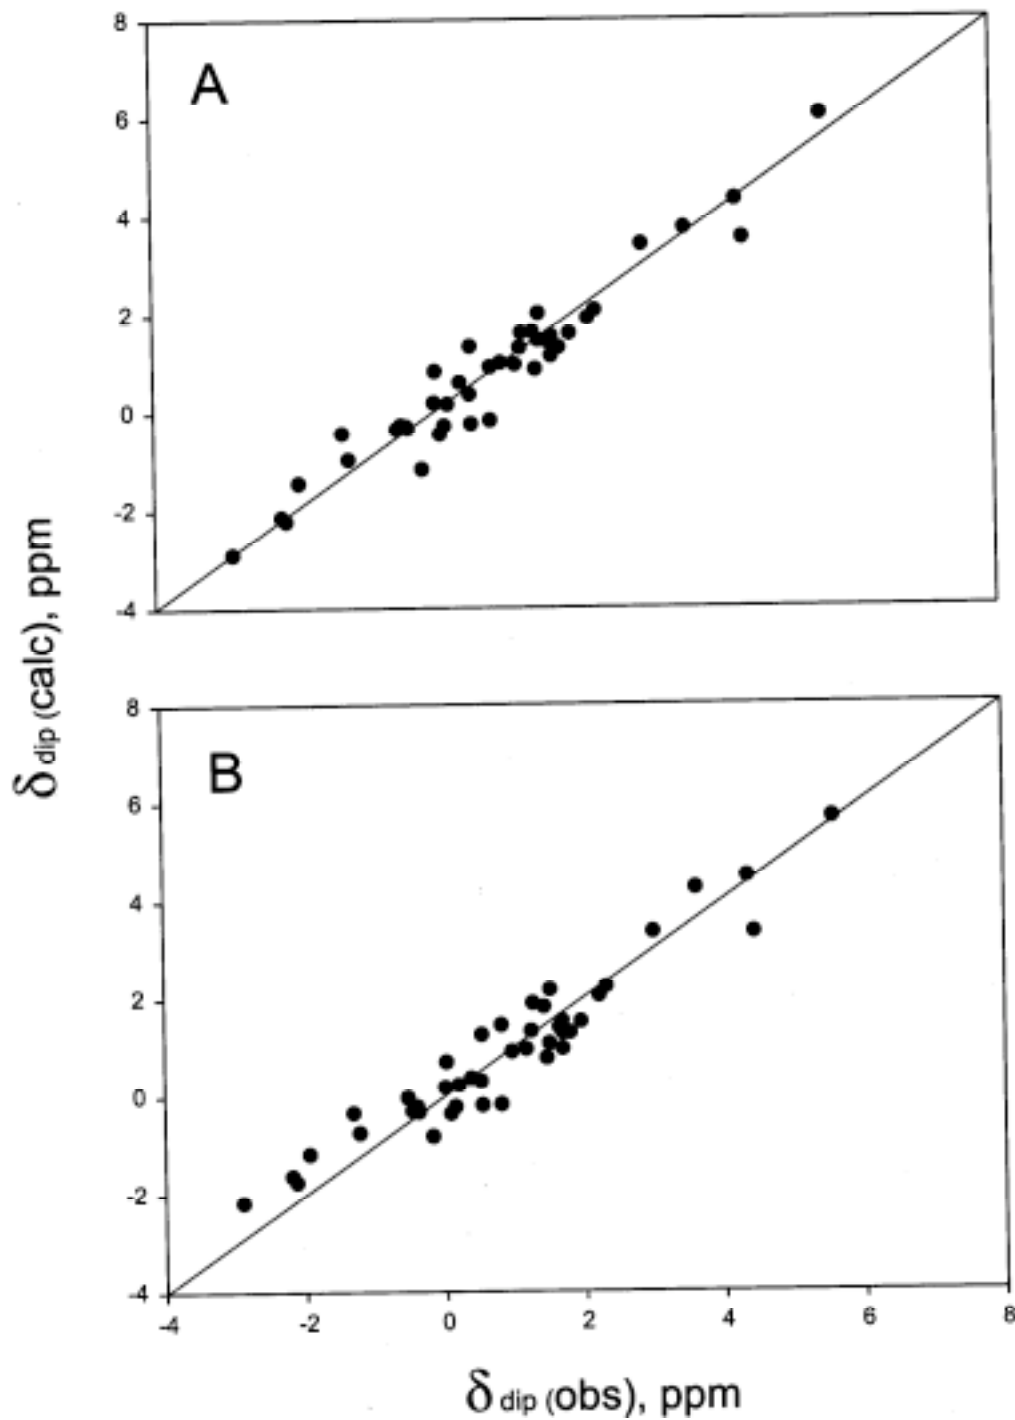

**Figure S3.** Plots of  $\delta_{\text{dip}}(\text{obs})$  versus  $\delta_{\text{dip}}(\text{calc})$  obtained from the magnetic axes determination of *NmHO-PH-CN* based on: (A) five-parameter search to determine  $\Delta\chi_{\text{ax}} (= 2.48 \pm 0.1 \times 10^{-8} \text{ m}^3/\text{mol})$ ,  $\Delta\chi_{\text{rh}} (= -0.52 \pm 0.09 \times 10^{-8} \text{ m}^3/\text{mol})$ , the tilt of magnitude ( $\beta = 8 \pm 1^\circ$ ), tilt direction ( $\alpha = 280 \pm 10^\circ$ ) and rhombic axes ( $\kappa = 41 \pm 10^\circ$ ); and a three-parameter search keeping  $\Delta\chi_{\text{rh}} = 0$  and  $\gamma = 0$ , to determine  $\Delta\chi_{\text{ax}} (= 2.4 \pm 0.1 \times 10^{-8} \text{ m}^3/\text{mol})$ , tilt magnitude ( $\beta = 4 \pm 1^\circ$ ) and tilt direction ( $\alpha = 260 \pm 10^\circ$ ). The residues error function,  $F/n$ , is smaller for the five-parameter ( $F/n = 0.05$ ) than three-parameter ( $F/n = 0.06$ ) search.

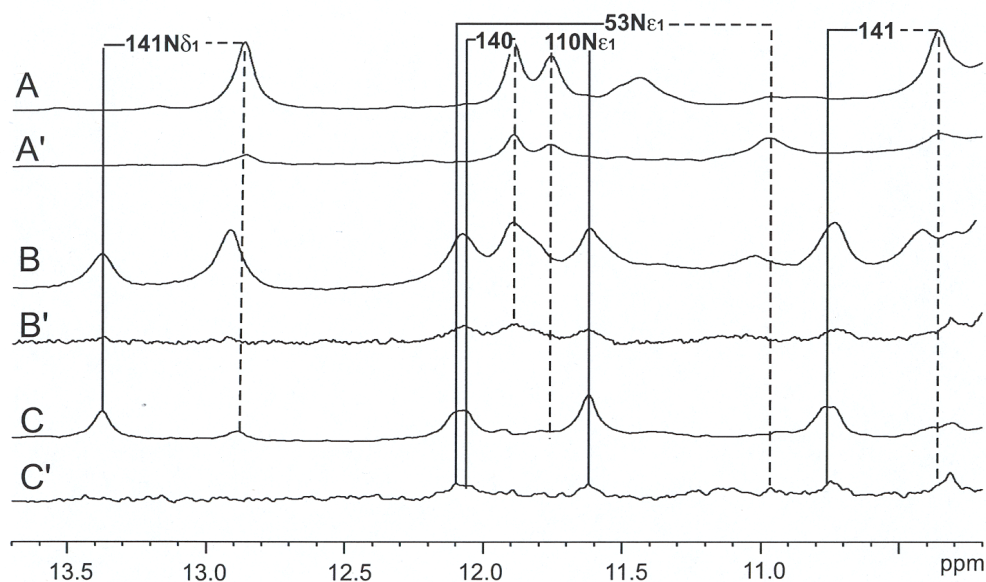

**Figure 4S.** 3:9:19 reference spectra<sup>52</sup> for the labile proton involved in strong H-bonds in *NmHO-PH-H<sub>2</sub>O/NmHO-PH-OH* mixture in <sup>1</sup>H<sub>2</sub>O, 50 mM in phosphate at 25°C, as a function of pH. Assigned peak in *NmHO-PH-H<sub>2</sub>O*<sup>50</sup> and *NmHO-PH-OH* are connected by bars over the reference spectra, with dashed and solid vertical lines representing the *NmHO-PH-H<sub>2</sub>O* and *NmHO-PH-OH* complexes, respectively. (A) pH 7.2 (~98% *NmHO-PH-H<sub>2</sub>O*/2% *NmHO-PH-OH*) (B) pH 9.4 (~60% *NmHO-PH-H<sub>2</sub>O*/~40% *NmHO-PH-OH*) and (C) pH 10.2 (20% *NmHO-H<sub>2</sub>O*/80% *NmHO-OH*). Magnetization difference 3:9:19 traces upon subtracting the off-resonance from the on-resonance saturation of the water signals as a function of pH as shown in A', B' and C', which demonstrate the saturation factor due to exchange and not increased (for His141 N<sub>δ</sub>H actually decreased) upon increasing pH from 7.2 to 10.2.
